# Supplementary material for: DNA Methylation and Gene Expression Changes in Monozygotic Twins Discordant for Psoriasis: Identification of Epigenetically Dysregulated Genes
Source: PLoS Genet. 2012 Jan 19;8(1):e1002454. doi: 10.1371/journal.pgen.1002454 (PMC3262011; doi:10.1371/journal.pgen.1002454)
Supplement: Table S1 — Genes showing cell-type specific DNA methylation. This table consists of probes on the 27K Infinium BeadChip and corresponding adjusted P-values from a paired t-test of CD4+ versus CD8+ cells in 12 unaffected individuals. (XLSX) [file pgen.1002454.s003.xlsx]

## Sheet: Sheet1
Table S1. Genes showing cell-type specific DNA methylation.
This table consists of probes on the 27K Infinium BeadChip and corresponding adjusted P-values from a paired t-test of CD4+ versus CD8+ cells in 12 unaffected individuals.
ILMNID	cor_p_value
cg01782486	3.17932e-09
cg01124420	6.3825e-08
cg02374486	7.32112e-08
cg22908581	2.56209e-07
cg13500388	2.56209e-07
cg20492912	8.1815e-07
cg24019564	9.55249e-07
cg14182690	1.19755e-06
cg13152535	1.20028e-06
cg03439703	1.69386e-06
cg07816074	1.69386e-06
cg07543883	2.76833e-06
cg23506842	2.76833e-06
cg20047055	2.76833e-06
cg25655096	2.76833e-06
cg19235307	2.86883e-06
cg09914304	2.86883e-06
cg26660631	3.11755e-06
cg16529592	4.59004e-06
cg09523691	4.65197e-06
cg26757673	4.65197e-06
cg00987379	4.65383e-06
cg02947253	4.65383e-06
cg22512531	4.74555e-06
cg04759756	5.60231e-06
cg24921089	6.08186e-06
cg12916723	6.09884e-06
cg14027234	6.6179e-06
cg19614321	7.30125e-06
cg11721194	7.30125e-06
cg11849692	7.30125e-06
cg06688396	7.53003e-06
cg25894551	7.53003e-06
cg04183425	1.00012e-05
cg16470760	1.2595e-05
cg18440048	1.27241e-05
cg03104936	1.47696e-05
cg01646665	1.65542e-05
cg23769143	1.65542e-05
cg20768743	1.82334e-05
cg25915982	2.1201e-05
cg17186163	2.1201e-05
cg23792978	2.12558e-05
cg00899659	2.33091e-05
cg02962602	2.67559e-05
cg16604516	2.74315e-05
cg03752628	2.94972e-05
cg09548084	3.26574e-05
cg13015534	3.64575e-05
cg20916523	3.64575e-05
cg24092914	3.64575e-05
cg18303397	3.73329e-05
cg23858360	3.76951e-05
cg18787975	4.24967e-05
cg20340242	4.24967e-05
cg18661868	4.57762e-05
cg01946401	4.57762e-05
cg13164537	4.65531e-05
cg04126866	4.81295e-05
cg01861509	4.81295e-05
cg26365668	5.29513e-05
cg00504595	6.96567e-05
cg18333690	7.16545e-05
cg24456340	7.61892e-05
cg21418052	8.14183e-05
cg19399532	8.74572e-05
cg18350391	8.95096e-05
cg17839611	9.61158e-05
cg22972055	9.6376e-05
cg17729941	0.000104599
cg00234961	0.000107563
cg27187881	0.000123087
cg06415153	0.000123087
cg18149207	0.000123087
cg14423778	0.000124747
cg05615150	0.000124747
cg12218747	0.000129349
cg16396488	0.000134298
cg16826286	0.000134298
cg26848126	0.000134298
cg05570980	0.000134298
cg09499849	0.000134946
cg03626672	0.000134946
cg03019000	0.000141551
cg23272214	0.000149442
cg15013019	0.000153535
cg18081258	0.000172762
cg01739167	0.000182253
cg01305421	0.000182253
cg25623459	0.000182253
cg08632701	0.000182253
cg11398517	0.000182253
cg20781967	0.000182253
cg06942110	0.000183601
cg16008138	0.000187389
cg21755709	0.000188428
cg23867494	0.00019122
cg16173109	0.00019122
cg09606564	0.000196274
cg25839227	0.000197371
cg10315334	0.000201588
cg20535085	0.00020425
cg18081104	0.000211014
cg05881762	0.00021725
cg20125091	0.00021725
cg18356799	0.000221199
cg02334775	0.000221199
cg03602500	0.000221199
cg26806924	0.000235076
cg26227465	0.000250488
cg14523284	0.000250991
cg09106999	0.000252481
cg00986320	0.000256521
cg07837085	0.000258087
cg04341806	0.000258087
cg21092324	0.000258087
cg20973210	0.000258087
cg17662177	0.00029448
cg04398282	0.000306392
cg03389133	0.000337167
cg11147193	0.000337167
cg23909633	0.000337849
cg07548313	0.000337849
cg10163825	0.00033952
cg04881903	0.000341916
cg02196805	0.000341916
cg23732024	0.000341916
cg09205751	0.000341916
cg03887787	0.000357313
cg06236061	0.000362151
cg24851490	0.000362151
cg10922280	0.000365711
cg06778853	0.000381705
cg17823175	0.000402889
cg11492856	0.000414192
cg00687674	0.000428346
cg12971694	0.000438527
cg12578166	0.000438527
cg17805404	0.000439327
cg13500819	0.000454198
cg17329164	0.000454198
cg23762517	0.000475673
cg24408313	0.00048225
cg04887278	0.00048225
cg22054164	0.000515379
cg08899626	0.000533702
cg03270204	0.000534002
cg03030757	0.000537199
cg05044994	0.000537199
cg00620024	0.000556268
cg06906435	0.000588773
cg15464148	0.000596446
cg20790056	0.000596446
cg07376232	0.000596446
cg10126923	0.000619447
cg25087423	0.000626566
cg20780953	0.000655132
cg21400896	0.000655132
cg05554718	0.000699397
cg22794078	0.000719805
cg20164720	0.000727727
cg21992250	0.000738915
cg09300114	0.000739851
cg11898695	0.000739851
cg24599942	0.000739851
cg10409560	0.000739851
cg13337662	0.000739851
cg07810967	0.000743541
cg05995267	0.000776967
cg11976790	0.000800662
cg22726338	0.000800662
cg08123074	0.000840752
cg19903229	0.00086642
cg07671949	0.000878847
cg14035045	0.000948754
cg07685034	0.000958115
cg05125838	0.000958115
cg25181693	0.0010011
cg20179697	0.001005
cg01346718	0.0010153
cg09809672	0.0010153
cg17142183	0.0010153
cg08132711	0.00104479
cg14380517	0.00104479
cg09088576	0.00106061
cg23265096	0.00106061
cg24385322	0.00106548
cg10094443	0.00108901
cg19812619	0.00112663
cg11460364	0.00113377
cg07141002	0.00113377
cg07086380	0.00113424
cg18042806	0.00113424
cg20430816	0.00113424
cg12762799	0.00114892
cg09037813	0.00115723
cg12593411	0.0011678
cg03634997	0.00117468
cg14500718	0.00120729
cg25957124	0.00120729
cg13718960	0.00120729
cg18338021	0.00120729
cg15526708	0.00120729
cg10549973	0.00122085
cg21387281	0.00122085
cg26580095	0.00122085
cg07388493	0.00122085
cg16371833	0.00122085
cg11175476	0.00122085
cg08216808	0.0012354
cg16670497	0.00125078
cg23829949	0.00136364
cg11397854	0.00136364
cg14370448	0.0013676
cg21578541	0.00137147
cg05700681	0.00137147
cg05806233	0.00137147
cg09190408	0.00137147
cg03171924	0.0013802
cg21092462	0.0013802
cg10517312	0.0013828
cg22844623	0.00138306
cg22799850	0.00138393
cg24335895	0.00138393
cg24727203	0.00142584
cg06692957	0.00142758
cg21096966	0.00145476
cg03874127	0.00146074
cg17518962	0.00148796
cg16465939	0.00149898
cg07660236	0.00149898
cg03427831	0.00149898
cg02927346	0.00149898
cg12100791	0.00149898
cg26112639	0.00149913
cg08965235	0.00151492
cg20395892	0.00152369
cg15503752	0.00152369
cg26530341	0.00158042
cg12818699	0.00160327
cg24164563	0.00162703
cg27433088	0.00168283
cg10716163	0.00176933
cg10387416	0.00179448
cg10536916	0.00179448
cg06362985	0.00179448
cg14391855	0.00181929
cg05782445	0.00182516
cg15691199	0.00186146
cg00645579	0.00188906
cg11086066	0.00190685
cg24807354	0.00191573
cg13488201	0.00191573
cg03070194	0.00191936
cg08833432	0.00191936
cg14377791	0.00192452
cg03886110	0.00192695
cg26488636	0.00192695
cg10106388	0.00192695
cg08794763	0.00193633
cg22182666	0.00199276
cg20359349	0.00199461
cg26991946	0.00205918
cg00935364	0.00205918
cg25511807	0.00213398
cg00033516	0.00222828
cg11977634	0.00222828
cg05830416	0.00222828
cg16796951	0.00222828
cg12062492	0.00227439
cg23841186	0.00227439
cg21784940	0.00231715
cg15258980	0.00234671
cg19278780	0.00234962
cg00135056	0.00237698
cg23002907	0.00239128
cg13666340	0.00242183
cg15512851	0.00243562
cg04502814	0.00254324
cg14870271	0.00254453
cg20126106	0.00258393
cg16280667	0.00259753
cg13446199	0.00264955
cg03222066	0.00266712
cg08766149	0.00274853
cg12417466	0.00274853
cg23324787	0.00275195
cg26912636	0.0028165
cg07156669	0.00283381
cg12941369	0.00284165
cg17461214	0.00287086
cg10465696	0.00293691
cg21581873	0.00294859
cg18055007	0.00294859
cg20790540	0.00294859
cg03368758	0.00294859
cg02141675	0.00294859
cg14400118	0.00294859
cg01820374	0.00294859
cg00995520	0.00298651
cg14902389	0.00304955
cg10506318	0.00309683
cg06037693	0.0031028
cg24910675	0.00312853
cg15777781	0.00319944
cg02150910	0.0032502
cg27037648	0.0032502
cg06595693	0.00325361
cg14982472	0.00327603
cg06566994	0.00330657
cg02227605	0.00331585
cg15868302	0.00332876
cg17181653	0.00334768
cg20925954	0.00337221
cg27560292	0.00337375
cg24087944	0.00348707
cg12438034	0.00348707
cg20782689	0.00377911
cg15046693	0.00378578
cg20651453	0.00379434
cg21910663	0.00379434
cg20074795	0.00379927
cg13150596	0.00380325
cg03548857	0.00380325
cg08361238	0.00396062
cg09208010	0.00396062
cg24691453	0.00396062
cg24919972	0.00401974
cg17460386	0.00413541
cg03430998	0.00413541
cg05996042	0.00415985
cg13669740	0.00418324
cg21105318	0.00418547
cg10934032	0.00418547
cg20713492	0.00420837
cg06827038	0.00422203
cg25421002	0.00423164
cg17714799	0.00425622
cg12262564	0.00425622
cg24838010	0.00425622
cg23509869	0.00429674
cg12412075	0.00431423
cg05164634	0.00431896
cg04391111	0.00431896
cg07639720	0.00431896
cg07427065	0.00433601
cg22375610	0.00434011
cg13492227	0.0043476
cg20267005	0.00436101
cg25066857	0.00437999
cg17693957	0.00460393
cg23665603	0.00468292
cg23282949	0.00468453
cg26062856	0.00471891
cg19586645	0.00489095
cg27465569	0.00489095
cg01344171	0.00494126
cg12360736	0.00497163
cg07658590	0.00497895
cg25119415	0.00498484
cg08528984	0.00498484
cg17001035	0.00498484
cg08529529	0.00498647
cg15945769	0.00498647
cg10275770	0.00504294
cg25753817	0.00505949
cg11378686	0.00505981
cg21818252	0.00506848
cg11061975	0.00506848
cg21043558	0.00506848
cg15396367	0.00513495
cg22960952	0.00513495
cg27060381	0.00513495
cg11884546	0.00518639
cg19853760	0.00523819
cg15322932	0.00523819
cg17627559	0.0052804
cg18937321	0.00538801
cg04404982	0.0054834
cg22467071	0.0054936
cg22064451	0.00551239
cg05698069	0.0056002
cg21022247	0.00571922
cg11320084	0.00574345
cg10920765	0.00580476
cg10148280	0.00581948
cg21974996	0.00589687
cg27613076	0.0059072
cg24909975	0.00592001
cg19531130	0.00592001
cg08840010	0.00592343
cg04653021	0.00600379
cg00145118	0.00603214
cg05330360	0.00606777
cg16692277	0.00613394
cg22699362	0.00613574
cg19037167	0.00616556
cg12286890	0.0061847
cg00201234	0.00623262
cg21513385	0.00626708
cg26512148	0.00640288
cg09424308	0.00644229
cg11747499	0.00649405
cg04757093	0.00649405
cg13017345	0.00665744
cg19917856	0.00677654
cg17740645	0.00677654
cg05439368	0.00677654
cg03856723	0.00677654
cg21509097	0.00680681
cg14764661	0.00686702
cg09082287	0.00686702
cg01550148	0.00687549
cg11787522	0.00691222
cg13828047	0.00691222
cg09424896	0.00691927
cg12099051	0.00691999
cg11378484	0.00700058
cg12336540	0.00703611
cg07679836	0.00703611
cg04756629	0.00716829
cg04797323	0.00716829
cg23771929	0.00716829
cg11263296	0.00727494
cg17361154	0.00730374
cg12556134	0.00744353
cg19187185	0.00751157
cg09328024	0.00759074
cg09088834	0.00763074
cg06096336	0.00771014
cg22549408	0.00773296
cg27491887	0.00773296
cg08843314	0.00773296
cg23508052	0.00773296
cg27118825	0.00773296
cg04920616	0.00773296
cg00350296	0.00773296
cg17607231	0.00773296
cg18910313	0.00774705
cg15206445	0.00774761
cg07152925	0.00782299
cg08263647	0.00782524
cg03177025	0.00782842
cg17009433	0.00792398
cg16858125	0.00792398
cg18119407	0.00811308
cg08109646	0.00811308
cg07218880	0.008142
cg27032184	0.00815686
cg04463638	0.00821778
cg00754617	0.00823127
cg03682712	0.00824618
cg12387247	0.00837522
cg11808757	0.00841673
cg26143719	0.00846889
cg19096034	0.00850305
cg15227982	0.0085543
cg23022999	0.00857188
cg02218324	0.00874384
cg00136405	0.00880646
cg23813257	0.00880646
cg07028533	0.00888948
cg18361093	0.00890392
cg21643361	0.00892203
cg08602689	0.00894887
cg01242619	0.00897637
cg19947621	0.00897793
cg09096950	0.00898491
cg11318251	0.00903867
cg00431549	0.00919012
cg09234474	0.00920275
cg21350115	0.00931011
cg00447208	0.0093177
cg00105253	0.00933928
cg18920397	0.00939227
cg15188491	0.00939227
cg00328227	0.00943727
cg24989962	0.00946729
cg22183706	0.00947009
cg25827666	0.00947009
cg10186456	0.00950689
cg14249872	0.00950689
cg07602200	0.00950689
cg11944101	0.00950689
cg08623383	0.00955021
cg04156850	0.00965326
cg01369981	0.00979199
cg20881888	0.00979199
cg16361890	0.00985267
cg10414058	0.00985267
cg19963522	0.00997704
cg10045881	0.00997704
cg22129364	0.00997704
cg04662594	0.00997704
cg07293947	0.0101128
cg00168942	0.0101875
cg15796682	0.0101941
cg03310453	0.0101941
cg14992253	0.0104517
cg14436426	0.0105468
cg02635407	0.0105903
cg04283392	0.0106011
cg13645811	0.0106301
cg21771250	0.0106301
cg04794268	0.0106474
cg10235741	0.0107019
cg02498063	0.0107019
cg05098732	0.0107019
cg22341104	0.0107019
cg14117297	0.0107019
cg19154438	0.0107486
cg01526089	0.0109684
cg24587268	0.0109684
cg26697117	0.0109684
cg26186727	0.0109684
cg18895972	0.010969
cg14643978	0.0110793
cg23696949	0.0111297
cg17966619	0.0111363
cg25226014	0.0113621
cg18216249	0.0114982
cg01457080	0.0115741
cg10737521	0.0116645
cg13975369	0.0117283
cg12460359	0.0119961
cg03379131	0.0120387
cg23917399	0.0122045
cg08519905	0.0122226
cg09009259	0.0122545
cg16772514	0.0122545
cg17980508	0.0123291
cg13030582	0.0123291
cg15003434	0.0123835
cg08214029	0.012399
cg27470554	0.0124956
cg18765542	0.0125266
cg26609631	0.0125726
cg16393207	0.0125764
cg09009380	0.0125811
cg11719452	0.0128668
cg09855435	0.0128668
cg07753644	0.0128668
cg04315771	0.0128668
cg25983380	0.0128668
cg14324675	0.0130024
cg10073091	0.0130024
cg06590711	0.0130593
cg17651821	0.0130692
cg13088755	0.0130692
cg03973663	0.0132552
cg00278366	0.0132733
cg22681784	0.0132733
cg01185080	0.0132733
cg26975609	0.0133435
cg17051440	0.0133435
cg07707227	0.0133435
cg14384532	0.0133435
cg04780126	0.0133591
cg26322315	0.0133591
cg20868410	0.0133591
cg26453990	0.0133591
cg02741249	0.0133891
cg12548454	0.0135239
cg12554857	0.0135281
cg18239753	0.0135281
cg24642820	0.0135281
cg16155382	0.013565
cg17819635	0.013565
cg01589580	0.0136242
cg15195412	0.0138294
cg18611122	0.0138294
cg00974864	0.0138294
cg18328933	0.0138307
cg09350141	0.0138398
cg21572897	0.0138398
cg10084993	0.0138398
cg11054882	0.0138398
cg19124998	0.0138398
cg14120436	0.0138398
cg06509940	0.0138818
cg15317267	0.0139501
cg22417398	0.0140349
cg13438834	0.0140728
cg04600618	0.0141073
cg16414852	0.0142349
cg14951292	0.0142349
cg26202340	0.0142349
cg20716119	0.0142349
cg10515956	0.0142349
cg14093936	0.0143416
cg08211967	0.0143416
cg03873930	0.0144646
cg13509147	0.0145514
cg26482939	0.0146496
cg08146221	0.0146674
cg01803059	0.0146922
cg27158867	0.0147336
cg26246296	0.0148445
cg26524899	0.0148822
cg04587910	0.0148822
cg14652095	0.0149032
cg03475172	0.0150364
cg09971811	0.0150449
cg17471102	0.0151481
cg17471928	0.0152618
cg21697134	0.0152655
cg01936555	0.0154133
cg10321723	0.0154133
cg07295678	0.0154133
cg07816439	0.015458
cg01988129	0.0154662
cg26607785	0.0155198
cg24170090	0.0155198
cg02533173	0.0159056
cg20557202	0.0159327
cg11398680	0.0160124
cg04862249	0.0160124
cg11130441	0.0160461
cg15983538	0.0165289
cg07654934	0.0165365
cg19001226	0.0165365
cg15984822	0.0165365
cg13749822	0.0165649
cg25027167	0.0165717
cg20654468	0.0165816
cg10977115	0.0165816
cg20716064	0.0166479
cg25423402	0.0167233
cg00951770	0.0167233
cg24330042	0.0167255
cg01909245	0.0167563
cg21557231	0.0167967
cg19026260	0.0168965
cg16869108	0.0169543
cg11744351	0.0169543
cg13574590	0.0169543
cg14603345	0.0169543
cg15879316	0.0169566
cg15379633	0.0169571
cg18691434	0.0169813
cg24035962	0.0170253
cg03156547	0.0171357
cg15095327	0.0173061
cg08185661	0.0173812
cg26229274	0.0174045
cg25852472	0.0175467
cg10664272	0.0177301
cg03173722	0.017976
cg05592398	0.0179797
cg21643045	0.0180865
cg11792664	0.0180865
cg01567482	0.0180865
cg07950803	0.0180865
cg13191049	0.0180865
cg02417408	0.0180988
cg09626984	0.0181142
cg10719920	0.0181383
cg15547534	0.0182942
cg17301902	0.0183301
cg11921829	0.0183301
cg12090242	0.0183926
cg14163776	0.0183926
cg12535715	0.0184262
cg04588079	0.018472
cg10602543	0.0184909
cg14494812	0.0185249
cg13259290	0.0186167
cg12836863	0.0186503
cg02100629	0.0187161
cg04113075	0.0187163
cg20804101	0.0187243
cg26154999	0.0187243
cg04044684	0.0187243
cg18829411	0.0188243
cg06985415	0.018853
cg13221796	0.0190562
cg18192417	0.0190631
cg19742789	0.0190631
cg09439093	0.0190631
cg11072113	0.0192698
cg24092253	0.0194191
cg09667226	0.0195069
cg09429111	0.0198336
cg01594262	0.0198347
cg21573601	0.0198347
cg20622019	0.0199698
cg13266292	0.0201085
cg03179866	0.0202001
cg16003913	0.0202001
cg26206598	0.0203842
cg23300372	0.0203908
cg05071677	0.0203908
cg10213821	0.0204685
cg03782727	0.020505
cg11979312	0.020505
cg26128092	0.0205355
cg10829134	0.0206407
cg12788061	0.0206607
cg26780333	0.0208276
cg04301614	0.0208276
cg23093496	0.0208276
cg12703269	0.0209138
cg14437986	0.0210247
cg18495563	0.0212048
cg02206259	0.0212048
cg09025324	0.0213391
cg27409012	0.0213733
cg01226883	0.0213952
cg11765205	0.0214787
cg26233914	0.0215398
cg23178308	0.0215398
cg04836038	0.0215398
cg07181881	0.0215398
cg07059052	0.021543
cg03483626	0.0215625
cg10182321	0.021707
cg18096388	0.0219188
cg04454259	0.0219188
cg25437385	0.0219274
cg04425624	0.0219274
cg05419984	0.0219524
cg15936718	0.0219524
cg11680236	0.0219805
cg04759439	0.0220164
cg22368262	0.0227704
cg22875391	0.0230321
cg01623438	0.0230321
cg01090445	0.0230701
cg16245844	0.0231881
cg05729093	0.0233825
cg16540704	0.0233825
cg17142470	0.0233825
cg23185262	0.0234536
cg05949660	0.0234536
cg06385087	0.0235274
cg01599709	0.0236375
cg19603195	0.0238019
cg26199493	0.0238466
cg21544377	0.0239012
cg14386691	0.0239436
cg01237132	0.0239436
cg11850311	0.0239436
cg25028542	0.0239436
cg11105610	0.0239758
cg19067730	0.0239974
cg14865868	0.0241412
cg03944089	0.0241628
cg01245656	0.0241784
cg08203715	0.0241784
cg21416022	0.0242048
cg08390209	0.0242452
cg03440846	0.0243922
cg07937272	0.0244323
cg23909343	0.0245798
cg24269276	0.0246147
cg19594691	0.0246147
cg08137040	0.0246147
cg09989134	0.0246414
cg00544557	0.0246709
cg01367992	0.0246808
cg03600687	0.0247377
cg26601286	0.0247516
cg26007077	0.0249636
cg01827098	0.0249636
cg27352992	0.0249758
cg04180868	0.0250151
cg18059933	0.0250351
cg04953015	0.0251519
cg13668129	0.0251527
cg06147863	0.0251527
cg00024812	0.0253083
cg20059151	0.025318
cg26363196	0.0255515
cg17215680	0.0256453
cg02755525	0.0257264
cg12800145	0.0257264
cg05018361	0.0257264
cg09242541	0.0257264
cg05795313	0.0257764
cg19135761	0.0258662
cg12555907	0.0259638
cg26333317	0.0259638
cg08603768	0.0260285
cg06202984	0.0260285
cg06141123	0.0260745
cg27268486	0.0260745
cg05286874	0.0260971
cg05436231	0.0260971
cg23657409	0.0263601
cg15928398	0.0263618
cg27372468	0.0264519
cg23356993	0.0264519
cg03714916	0.0265668
cg24125648	0.0265915
cg04444771	0.0267207
cg12842316	0.0268506
cg16293656	0.0269379
cg16296356	0.0269533
cg00167504	0.0271817
cg15959756	0.0271817
cg13758659	0.0271817
cg02981703	0.0271817
cg21407055	0.0271817
cg19700658	0.0271817
cg24310246	0.0271817
cg07688613	0.0271817
cg26371206	0.0273043
cg06154570	0.0273043
cg05451974	0.0273484
cg24861272	0.0273484
cg24602243	0.0273484
cg26968812	0.0273484
cg08260891	0.0274952
cg07973967	0.0274952
cg03160815	0.0277861
cg15457899	0.0278327
cg04141379	0.0278327
cg10575414	0.0279151
cg03764352	0.0283998
cg16543294	0.0283998
cg06291334	0.0284019
cg00411097	0.028522
cg05338167	0.028522
cg21584430	0.0285316
cg14458834	0.0285389
cg25488206	0.0285611
cg25423576	0.0285611
cg20664247	0.0285611
cg14448145	0.0285611
cg01437411	0.0286089
cg24200059	0.0286089
cg19923810	0.0287228
cg21850254	0.0287325
cg01352108	0.0287329
cg18936744	0.0287444
cg20925811	0.0287444
cg10196289	0.0287444
cg14519350	0.0287444
cg26717133	0.0287444
cg11752275	0.0287793
cg15743985	0.0287939
cg17431739	0.0288932
cg25084878	0.0289219
cg10885645	0.0289885
cg21291896	0.0289885
cg12324629	0.0290099
cg20987610	0.029178
cg16155702	0.029178
cg27345286	0.0292693
cg25882366	0.0293248
cg26775866	0.0294162
cg15589427	0.0295018
cg19194454	0.0295485
cg14292823	0.0295761
cg06850526	0.0295937
cg25827112	0.0295977
cg02569086	0.0295977
cg25430696	0.0295977
cg12657853	0.0296711
cg21929993	0.0298897
cg04575343	0.0300092
cg15659828	0.0300092
cg00953256	0.0300166
cg17118262	0.0300831
cg12966875	0.0301228
cg14958635	0.0301228
cg24516901	0.030185
cg04151683	0.030185
cg09054876	0.0303067
cg10237911	0.0305457
cg17571291	0.0306806
cg26845300	0.0306806
cg02901679	0.0306806
cg21275690	0.0306806
cg01517728	0.0306806
cg11828089	0.0306806
cg118280982	0.0306806
cg21238818	0.0306806
cg00035347	0.0306806
cg20676542	0.0306806
cg24956866	0.0307103
cg02486845	0.0308277
cg02916816	0.0309103
cg16899442	0.0309762
cg24898753	0.0310282
cg04675937	0.0311497
cg07457944	0.031222
cg03593419	0.031222
cg09260564	0.031222
cg02317742	0.031222
cg03568064	0.031222
cg17682828	0.031222
cg25341032	0.031222
cg26149678	0.031222
cg02868123	0.031222
cg17460095	0.0312617
cg11098259	0.0312687
cg16907514	0.0312687
cg24623694	0.0312687
cg08993557	0.0312687
cg17338403	0.0314316
cg18312782	0.031487
cg20387706	0.031487
cg01557989	0.031487
cg05341115	0.031487
cg06722216	0.031487
cg10028071	0.031487
cg21209091	0.031487
cg16386080	0.031487
cg00698688	0.031487
cg02564523	0.031487
cg24012708	0.0316149
cg01491225	0.0316202
cg17832674	0.0316202
cg23377693	0.0316263
cg00022866	0.0316263
cg08097882	0.0316378
cg10599444	0.0317834
cg05275752	0.0318207
cg24242519	0.0318207
cg03063797	0.0318207
cg06637893	0.0318207
cg22437284	0.0318207
cg01013324	0.0319028
cg00688421	0.0319028
cg09879797	0.0319357
cg16177830	0.0319404
cg19462352	0.0319801
cg26589285	0.0320507
cg13587552	0.0321611
cg19763281	0.0321611
cg19850370	0.0321611
cg23616741	0.032247
cg19560287	0.0322995
cg15091337	0.0322995
cg20678353	0.0325431
cg22335340	0.0325431
cg18468219	0.0327968
cg16777510	0.0328208
cg14226064	0.0328208
cg05566965	0.0328294
cg22920538	0.0328294
cg05146205	0.0328294
cg23665568	0.0328294
cg12167564	0.0328294
cg24182328	0.0330338
cg01143454	0.0331161
cg02604290	0.0331288
cg17067528	0.0331288
cg17177829	0.0331288
cg16530429	0.0331299
cg14030359	0.0332748
cg26179948	0.0333208
cg25718438	0.033388
cg23412850	0.0334179
cg00430945	0.0334475
cg08274552	0.0334852
cg09868035	0.0334852
cg00833777	0.0335405
cg01962969	0.0335405
cg19005210	0.0335917
cg03014628	0.0337204
cg05279707	0.0337273
cg04878152	0.0338662
cg21548788	0.0339466
cg08375941	0.0339466
cg05641961	0.0339466
cg05411032	0.0339466
cg24091698	0.0339987
cg22478328	0.0341376
cg05840553	0.03418
cg10240083	0.0342293
cg08108311	0.0342932
cg24137081	0.0343334
cg05940463	0.0343334
cg11738543	0.0343334
cg25140370	0.0344124
cg24189717	0.0345767
cg17803089	0.0345767
cg01580044	0.0345767
cg08763433	0.0345894
cg01773854	0.0346504
cg14973995	0.0347131
cg21052164	0.0348079
cg25055477	0.0348124
cg15739437	0.0349231
cg15778350	0.0349231
cg18885999	0.0349231
cg00948524	0.0349431
cg23865698	0.0350365
cg02058918	0.0350365
cg27619475	0.0350365
cg17890764	0.0350365
cg07730301	0.0351525
cg19103704	0.0351525
cg15298323	0.0351525
cg14506668	0.0351525
cg23571457	0.0352184
cg27444994	0.035295
cg16362133	0.0353759
cg04790874	0.0354017
cg26789453	0.0354672
cg03791917	0.0354672
cg04745805	0.0355769
cg07260017	0.035847
cg20787196	0.0359009
cg24854010	0.0362292
cg14009688	0.0362665
cg01126560	0.0363272
cg20469837	0.0363867
cg27319898	0.0364899
cg24805239	0.0364899
cg06701500	0.0365223
cg06409153	0.0365326
cg16504798	0.0365326
cg11313124	0.0365326
cg18956481	0.0365326
cg26548883	0.0365326
cg00979348	0.0366122
cg03605761	0.0366162
cg17665608	0.0368056
cg02336128	0.036869
cg20587543	0.036971
cg14329976	0.0370951
cg02818322	0.0370951
cg22473973	0.0370951
cg01408558	0.0373171
cg02456292	0.0373265
cg05719902	0.037353
cg01692572	0.037353
cg18493182	0.0373947
cg01849789	0.0373947
cg18168989	0.037396
cg10861599	0.037396
cg08411435	0.0375465
cg24357161	0.0376275
cg02523617	0.0377928
cg22783363	0.0379009
cg02760007	0.038082
cg03700218	0.0381125
cg11504740	0.0383001
cg12080675	0.0383321
cg14823162	0.0383337
cg10872212	0.0383337
cg22443330	0.0383337
cg20919799	0.0383337
cg22040627	0.0383337
cg10387901	0.0383337
cg11175310	0.0383337
cg06887167	0.0384871
cg17199483	0.0384922
cg03943509	0.0384964
cg19712821	0.0386303
cg01966465	0.0386449
cg26043257	0.0386472
cg17605847	0.0386472
cg19081759	0.0386472
cg16539629	0.0386991
cg19481686	0.0387017
cg00739120	0.0387017
cg22031736	0.0387017
cg05606799	0.0387017
cg06311778	0.0387186
cg26331247	0.0387186
cg12124478	0.0387186
cg00518911	0.0387186
cg16786458	0.0388203
cg01761409	0.0389039
cg18995088	0.0389039
cg00826384	0.0389917
cg23165541	0.0389917
cg11221513	0.0390045
cg24264506	0.039013
cg18999668	0.0390578
cg05813234	0.0391401
cg01932459	0.0391401
cg06758848	0.0391786
cg03065202	0.0393148
cg11065385	0.0394202
cg24477636	0.0394471
cg06238491	0.0394661
cg20887241	0.0395552
cg11054936	0.039734
cg12639234	0.0397796
cg15952487	0.0397796
cg07423149	0.0399412
cg02198044	0.0399584
cg21816539	0.0399584
cg18972811	0.0399584
cg18735146	0.0399584
cg21804822	0.0399693
cg13997435	0.0399693
cg12125117	0.0399693
cg05360265	0.0399693
cg02449608	0.0399825
cg01655355	0.040378
cg03969797	0.040378
cg04794887	0.040378
cg23786576	0.0404836
cg19524049	0.0404836
cg09834162	0.0404962
cg07579404	0.0404962
cg24035370	0.0405399
cg02909042	0.0407469
cg26215428	0.0407469
cg19948014	0.0407469
cg11668923	0.0407469
cg25473396	0.0407469
cg23628240	0.0407469
cg10539712	0.040928
cg25608041	0.0409772
cg00233307	0.0409772
cg00563932	0.0411019
cg05423257	0.0411019
cg15426734	0.0411377
cg26212924	0.04115
cg23777956	0.0413779
cg03608974	0.0414352
cg01227741	0.0415699
cg08305742	0.041722
cg22289810	0.0417842
cg19286604	0.0417842
cg10671802	0.0417842
cg20637800	0.0418443
cg25802093	0.0418443
cg11595794	0.0420383
cg00677811	0.0420383
cg04431054	0.0420383
cg02497700	0.0420383
cg08139833	0.0421482
cg19939627	0.0421483
cg01511567	0.0422845
cg09537031	0.0422845
cg24124977	0.0422845
cg06491116	0.0422845
cg21237418	0.0422845
cg09686635	0.0422845
cg15658426	0.0422845
cg03819692	0.0422852
cg20224517	0.0423636
cg17625032	0.0424723
cg13271951	0.0424723
cg22534509	0.0424723
cg21600563	0.0424723
cg11323198	0.0425634
cg05142373	0.0425634
cg13540795	0.0425634
cg06557358	0.042732
cg18491230	0.0427549
cg08525145	0.0427549
cg19764436	0.0427549
cg12071073	0.0427549
cg22737001	0.0427549
cg24896109	0.0427549
cg23471482	0.0427737
cg26366091	0.0428655
cg20542190	0.0428763
cg02331561	0.0428831
cg16511708	0.0430839
cg07109287	0.0431742
cg14520511	0.0431742
cg09793796	0.0431742
cg03085377	0.0433074
cg11692477	0.0435162
cg11254522	0.0435162
cg23363832	0.0435411
	0.0435775
cg02879662	0.0437856
cg24613957	0.0437856
cg08778586	0.0439179
cg09768944	0.0439244
cg17240987	0.0441819
cg19706602	0.0443308
cg24546463	0.044433
cg13263483	0.0444484
cg03521347	0.0447053
cg05335315	0.0447331
cg22424444	0.0447661
cg05751148	0.0448934
cg22833292	0.0448952
cg22418909	0.0448952
cg12610070	0.0448958
cg26962295	0.0448958
cg00280814	0.0448958
cg10257049	0.0448958
cg05050341	0.0448958
cg19620294	0.0449299
cg05094216	0.0450315
cg18508125	0.0450533
cg08530414	0.045518
cg05861567	0.0456304
cg09383789	0.0456304
cg24031606	0.0456759
cg16112945	0.0457199
cg21120249	0.0457256
cg10559803	0.0459497
cg09535168	0.0459785
cg18602919	0.0460064
cg12600197	0.0460477
cg18017908	0.0461017
cg07705908	0.0461017
cg10883303	0.0461017
cg26699283	0.0461553
cg21148892	0.0461799
cg11584690	0.0461799
cg01333011	0.0463485
cg26577178	0.0463915
cg08697242	0.0463915
cg25124636	0.0463915
cg03989322	0.0464697
cg00320243	0.0466704
cg00731459	0.0466704
cg24046474	0.0466704
cg04794505	0.0466845
cg19192120	0.0467161
cg12073779	0.0468524
cg15612436	0.0470316
cg01120898	0.0471418
cg19881177	0.0472821
cg18750960	0.047349
cg05055720	0.0473573
cg16582344	0.047472
cg11426590	0.047472
cg09052983	0.047472
cg17468440	0.0476004
cg20843052	0.0476578
cg09195271	0.0476578
cg10175795	0.0476578
cg14494596	0.0477754
cg08319238	0.0478431
cg13060646	0.0478612
cg20287234	0.0479009
cg22038738	0.047908
cg24443367	0.0480929
cg04273431	0.0482914
cg01182697	0.0483449
cg24010336	0.0483449
cg02364642	0.0483449
cg22226839	0.0483765
cg08301503	0.0483765
cg20339230	0.0483765
cg05824432	0.0483933
cg00239685	0.0485123
cg03355526	0.0485138
cg21559783	0.0485938
cg25345738	0.0486604
cg07495664	0.0487168
cg21584983	0.0487823
cg14667273	0.048924
cg09069593	0.0490242
cg23881725	0.0490704
cg11474075	0.0490704
cg22319147	0.0490704
cg16853982	0.0490704
cg14127336	0.0491419
cg05927017	0.0491419
cg17483510	0.0491419
cg25372693	0.0494759
cg15731815	0.0494759
cg22183626	0.0495638
cg11793380	0.0495638
cg24682149	0.0495805
cg25216696	0.049594
cg18534872	0.0496266
cg09671611	0.0496675
cg26229607	0.0498087
cg25167643	0.0498169
cg00779924	0.0498235
cg11225935	0.0498498
cg27379587	0.0498498
cg15633390	0.0498498
cg23401756	0.0498498
cg20406374	0.0498498
cg18815943	0.0498498
cg26759551	0.0498498
cg00318865	0.0498498
cg23606023	0.0498498
cg17416146	0.0498498
cg13415434	0.0498498
cg21707816	0.0498498
cg23953831	0.0498498
cg06349174	0.049857
cg15270851	0.0498935
cg01192952	0.0498935
cg03109701	0.0499589
cg24399529	0.0499895
cg26035463	0.0499961
