# Supplementary material for: DNA Methylation and Gene Expression Changes in Monozygotic Twins Discordant for Psoriasis: Identification of Epigenetically Dysregulated Genes
Source: PLoS Genet. 2012 Jan 19;8(1):e1002454. doi: 10.1371/journal.pgen.1002454 (PMC3262011; doi:10.1371/journal.pgen.1002454)
Supplement: Table S2 — Genes showing cell-type specific gene expression. This table consists of the genes on the HumanHT-12 v3 Expression BeadChip and corresponding adjusted P-value from comparisons of CD4+ versus CD8+ cells in 13 unaffected individuals. (XLSX) [file pgen.1002454.s004.xlsx]

## Sheet: Sheet1
Table S2. Genes showing cell-type specific gene expression.
This table consists of the genes on the HumanHT-12 v3 Expression BeadChip and corresponding adjusted P-value
from comparisons of CD4+ versus CD8+ cells in 13 unaffected individuals.
ILMN_GENE	cor_p.val
CD8A	9.76e-28
CD4	2.86e-16
CTSW	8.44e-15
DBN1	5.45e-13
FBLN7	4.6e-12
CD8B	9.08e-12
PRF1	1.73e-09
MLLT11	1.03e-08
P2RX5	1.5e-08
PECAM1	1.55e-08
FAM108C1	6.4e-08
NME4	1.1e-07
CYSLTR1	1.37e-07
NKG7	1.41e-07
PVRL3	1.7e-07
SPRY1	1.7e-07
FLNB	1.88e-07
NELL2	1.88e-07
AFAP1L2	2.66e-07
LRRN3	3.29e-07
FAM184A	5.09e-07
CMTM7	5.68e-07
NEK3	5.68e-07
STX12	6.02e-07
KBTBD11	7.11e-07
HS.66187	7.98e-07
LIPE	8.39e-07
OCRL	8.39e-07
TESC	8.81e-07
TNFSF10	8.81e-07
LAG3	8.82e-07
GPR114	9.54e-07
IL8	9.8e-07
MPP5	9.8e-07
ITGB7	1.05e-06
ASB13	1.13e-06
JAK2	1.34e-06
KCTD6	1.34e-06
SNX25	1.34e-06
CCL5	1.54e-06
STAG2	1.69e-06
SORT1	2.04e-06
GALNTL4	2.06e-06
XCL1	2.07e-06
LOC644869	2.14e-06
HVCN1	2.4e-06
SEPN1	2.4e-06
CAMK1	2.96e-06
TRAT1	2.96e-06
CAPG	3.99e-06
IFNGR2	3.99e-06
TSHZ2	4.06e-06
CD80	4.1e-06
HS.582113	4.1e-06
LOC730525	4.1e-06
LPAR5	4.1e-06
GNA11	4.35e-06
LOC654096	4.35e-06
PPP3CA	4.35e-06
QSOX2	4.35e-06
OSBPL10	4.5e-06
FILIP1L	4.51e-06
GRK5	4.51e-06
HS.564485	4.51e-06
NFS1	4.51e-06
APOBEC3F	4.56e-06
BANK1	4.6e-06
INSIG1	4.6e-06
ST7	4.6e-06
VSTM3	4.6e-06
HOXC4	4.62e-06
PHLDA1	7.33e-06
PTPLA	7.33e-06
HEG1	7.55e-06
CORO1B	7.69e-06
SNORA7B	7.69e-06
SLC37A3	8.28e-06
SMAD7	8.78e-06
FLJ10986	9.19e-06
C6ORF190	9.26e-06
LIMK2	9.26e-06
RNASEL	9.26e-06
USP54	9.27e-06
TTYH3	9.64e-06
INTS10	9.71e-06
APOBEC3G	9.83e-06
HDC	1.01e-05
HS.571502	1.02e-05
SMARCA2	1.02e-05
DTNBP1	1.08e-05
C14ORF82	1.11e-05
ELK1	1.11e-05
TLR5	1.16e-05
CTTN	1.24e-05
DACT1	1.24e-05
FASLG	1.24e-05
BMP1	1.26e-05
CMTM8	1.26e-05
SPSB1	1.26e-05
NCOA7	1.35e-05
SEMA4A	1.43e-05
ABI3	1.45e-05
ANXA1	1.45e-05
TNFSF4	1.45e-05
CD72	1.64e-05
HS.408455	1.64e-05
CXXC5	1.71e-05
GNPTAB	1.71e-05
KIT	1.71e-05
IRAK3	1.89e-05
PPAP2A	1.92e-05
SOCS3	1.92e-05
SH3BGRL3	1.94e-05
COL6A1	1.98e-05
ASXL2	2e-05
SAMSN1	2.03e-05
TSEN34	2.07e-05
UBAC1	2.15e-05
CD55	2.18e-05
RAPH1	2.2e-05
NAPSB	2.39e-05
GOLPH4	2.45e-05
ITPK1	2.45e-05
PTGIS	2.47e-05
CXCR3	2.55e-05
HS.407903	2.55e-05
HS.551847	2.66e-05
LMO4	2.66e-05
RAB24	2.66e-05
TBC1D14	2.66e-05
WDFY2	2.77e-05
PLEK	3.41e-05
COCH	3.51e-05
LOC650761	3.51e-05
KDELC1	3.56e-05
EMD	3.71e-05
CCDC102A	3.81e-05
CMAH	3.85e-05
SBF1	3.85e-05
MCFD2	3.98e-05
SLC25A4	3.98e-05
GALM	4.04e-05
KIAA1804	4.11e-05
EFCAB4A	4.12e-05
AHCYL2	4.17e-05
GAS8	4.17e-05
OSBP2	4.17e-05
CTSC	4.33e-05
STAT1	4.42e-05
BMP2K	4.44e-05
CD70	4.44e-05
COL6A2	4.44e-05
MPZL1	4.44e-05
ACSS2	4.47e-05
TPST2	4.47e-05
FLJ11795	4.74e-05
FLJ90231	4.99e-05
RAB11FIP5	5.07e-05
CERCAM	5.14e-05
LOC651158	5.14e-05
TMEM154	5.14e-05
TMEM173	5.14e-05
sep.11	5.24e-05
LMCD1	5.36e-05
TUFT1	5.47e-05
IMMP2L	5.54e-05
ANKRD55	5.79e-05
LRRC1	5.87e-05
ACCN2	6.01e-05
LYST	6.01e-05
BHLHB2	6.07e-05
PIK3R2	6.07e-05
GPR160	6.09e-05
SEMA4B	6.15e-05
PDCL	6.17e-05
FDFT1	6.38e-05
TXNDC11	6.38e-05
RBKS	6.45e-05
TAGAP	6.45e-05
CD248	6.72e-05
ID2	6.72e-05
KCNK1	6.72e-05
FAM64A	6.78e-05
STYK1	6.78e-05
LAMC1	6.8e-05
GSG2	6.81e-05
SMAD5	6.81e-05
BACH2	6.89e-05
CHEK2	6.89e-05
EPB49	6.89e-05
UBL4A	6.89e-05
SLC9A3R2	6.92e-05
BAG3	6.95e-05
IMPA2	6.95e-05
TMEM2	6.97e-05
MED8	7.11e-05
ASPHD2	7.2e-05
FAM176B	7.2e-05
HMGCS1	7.2e-05
LPXN	7.2e-05
SLAMF7	7.2e-05
VPS37B	7.2e-05
GAMT	7.32e-05
VASH1	7.38e-05
ATP8B4	7.39e-05
LOC729486	7.4e-05
NRIP3	7.48e-05
JUP	7.62e-05
DOK4	7.83e-05
PACSIN2	7.83e-05
C17ORF62	7.97e-05
SERPINB9	7.99e-05
KIAA1622	8.01e-05
AIM2	8.02e-05
TAP1	8.02e-05
GNE	8.1e-05
KIAA0182	8.1e-05
NUP98	8.28e-05
FAM46A	8.44e-05
NPSR1	8.67e-05
SGIP1	8.69e-05
HS.547738	8.74e-05
METTL7A	8.85e-05
MGST3	8.85e-05
ARHGEF10	8.86e-05
ITM2C	9.04e-05
HS.145444	9.11e-05
RRAGA	9.31e-05
IVNS1ABP	9.49e-05
PTPN22	9.49e-05
ACD	0.000101388
CD28	0.000101388
HIST1H2BI	0.000101862
LSP1	0.000103276
B3GNTL1	0.000104419
MAP4K5	0.000105082
LOC654103	0.000105206
SERTAD2	0.000106413
LUZP1	0.00010866
FHIT	0.000109098
SOAT2	0.000109854
SFXN5	0.000112092
IL1F7	0.000112154
RMND5B	0.000114446
ETV6	0.000120311
IL9R	0.000120407
ARID5B	0.000123842
TRIB3	0.000123842
CEBPB	0.000129447
ZNF683	0.000130926
AIG1	0.000132886
C9ORF72	0.000132886
FAM105B	0.000136262
PGBD1	0.000136708
HS.497591	0.000137399
KRCC1	0.000137469
C22ORF36	0.000138807
SPEN	0.000138807
BCL2L12	0.000140469
HS.270778	0.000144816
CD44	0.000146064
CS	0.000147167
RNF213	0.000147167
LGALS14	0.000153213
SEZ6L2	0.000153213
TARP	0.000153213
ENTPD1	0.000155258
TMOD1	0.000156487
NUBP1	0.000158796
GRAP2	0.000159839
CASP9	0.000160149
GABARAPL1	0.000160378
PGS1	0.000160378
CCNE1	0.000164721
C16ORF63	0.000168236
NTRK2	0.000168341
DBNDD2	0.000172729
PPP4R4	0.000173708
HS.543887	0.000175041
ANKRD57	0.000175281
HES1	0.000175281
FAAH2	0.000178119
IL1R2	0.000178471
FASTKD5	0.000181489
PARP8	0.000189338
TGFBR3	0.000189338
HS.191230	0.000189972
LOC732425	0.000193307
LOC648868	0.000194726
SLC2A6	0.000196793
AMICA1	0.000198802
ANKMY2	0.00020522
CBLB	0.00020522
GNL1	0.000208949
KCTD3	0.000217698
MPZL2	0.000219735
TNFRSF18	0.000219735
EXTL2	0.000222037
STS-1	0.000233697
SPIN4	0.00023421
SLC25A37	0.000236139
HDGFRP3	0.000236574
PIAS2	0.000236574
UBE2D3	0.000236574
APOB48R	0.000236847
CTDP1	0.000237096
UBE2G1	0.000237096
SEPX1	0.000237174
C11ORF74	0.000238542
PSMB10	0.000238542
ITGA1	0.000238799
TSEN54	0.000240734
RNF130	0.000252025
CYP4F22	0.000258148
GGTL3	0.000260105
GALK1	0.00026468
TNFSF12	0.000266973
FCRLB	0.000272656
TMEM14A	0.000275369
CD81	0.000278453
FXYD2	0.000279907
TIAM1	0.000279907
ZNF706	0.000279907
DCI	0.000281637
CD63	0.00028226
MGC3020	0.0002851
SCML2	0.0002851
ZMIZ1	0.000292399
FBLN5	0.000293835
GTF2IP1	0.000295823
OLAH	0.000295823
RIN3	0.000297065
FUT8	0.000303571
HS.524129	0.000303571
SLC24A6	0.000303571
PIP5K1C	0.000316135
GALNT6	0.000320212
KIAA1394	0.000320534
MANSC1	0.000327616
PAFAH1B3	0.000330771
RRAS2	0.000332798
PRR13	0.000333918
VIM	0.0003419
IL21	0.000351101
C9ORF25	0.000353494
NCALD	0.000353494
FLJ37464	0.000353735
LGMN	0.000353735
PCBP3	0.000353735
KIAA0859	0.000365268
TMEM205	0.000365547
KRT86	0.000378802
ADAM15	0.000379289
OSBPL3	0.000385225
CLOCK	0.000390478
EPN2	0.000397654
TPK1	0.00040356
PDSS2	0.00040407
LTA4H	0.000405516
BIVM	0.000410257
DFNB31	0.000414542
C1ORF24	0.000421322
HEYL	0.000421322
LPPR2	0.000421322
NAGA	0.000421322
STX3	0.000421322
TMEM55A	0.000421322
EDG1	0.00042637
HS.434957	0.000426949
sep.03	0.00042788
C6ORF52	0.000431189
GCNT1	0.000431189
ARPC1A	0.000440311
DHRS3	0.00044112
ATP6V0A1	0.000442771
PCCA	0.0004455
GK	0.000447587
LOC649260	0.000452116
IGFBP6	0.00045366
MYO1E	0.000489194
PNPLA6	0.000494147
SFRS17A	0.000498792
LFNG	0.00050135
FAM110C	0.000518332
HS.581585	0.000521487
ANKRD13C	0.00052219
EEPD1	0.000522894
RPS6KA2	0.000522894
KIAA1467	0.000523453
NANOS3	0.000536593
HIST1H2AH	0.000540457
GALNT11	0.000542602
RGL4	0.000542602
ENPP2	0.000545411
NEK8	0.000553223
TOX	0.000553223
LOC646786	0.000556098
SUPT3H	0.000561921
KLRC3	0.000567483
STT3B	0.000599389
ATXN1	0.000607391
CLDND2	0.000610785
TRAF3IP3	0.00061137
KRT7	0.000611779
PARD6A	0.000611779
PRR5	0.000611779
TCTN1	0.000611779
C11ORF63	0.000619701
SLC22A17	0.000631332
TSHZ3	0.000632731
TMEM99	0.000634877
GZMB	0.000643258
C13ORF27	0.000651765
CIB1	0.000651765
PHF10	0.000651765
GATAD1	0.000656946
C5ORF25	0.000665385
TAGLN3	0.000666658
FUT4	0.000668575
FKBP5	0.000673321
MGST2	0.00067788
HS.46506	0.000678226
REG4	0.000684319
ST8SIA4	0.000693434
SEMA4D	0.000701958
IGF1	0.000707069
VWA5A	0.000721516
SNN	0.00072185
CCR8	0.000722838
CECR5	0.000738587
CSNK1E	0.000739332
PAK4	0.000749163
GUCY1A3	0.000758312
PDE7A	0.000758955
ARID5A	0.000761639
EPOR	0.00077071
FGFBP2	0.000785423
SLC27A3	0.000785423
LOC650826	0.000810768
CBR3	0.000814966
VIL2	0.000834074
LOC643817	0.000840339
SBNO2	0.000861903
ACAD11	0.000864169
FAM171A1	0.00088996
NPHP4	0.00088996
ALS2CR14	0.000890343
GCLM	0.00090699
TCF3	0.000939468
ZKSCAN2	0.000942859
PRCP	0.00096842
CASP6	0.000975301
SNX29	0.000975946
SH2D1A	0.000983919
RAB35	0.000989675
PRDX6	0.00100291
IDH3A	0.00103125
DKFZP434K191	0.00103222
CALML4	0.0010354
HS.552266	0.0010354
MIER2	0.00106026
TMEM9	0.00108307
LOC647650	0.00108328
TNFSF9	0.0010984
WFS1	0.00111179
EDARADD	0.00112794
KLHDC8B	0.00112794
B3GNT2	0.00113348
CX3CR1	0.00114688
HS.403972	0.00114709
IL12A	0.00114709
VCAM1	0.00114709
MGC57346	0.00114741
FAM81A	0.00115181
COMMD8	0.00115344
CMAS	0.00116111
GLIPR1	0.00116352
RPS2	0.00116528
ZNF828	0.00117374
LOC146053	0.0011963
PPP1CC	0.0011963
TERC	0.0011963
LOC653778	0.00121831
RFXAP	0.00122209
CD48	0.00123382
MITD1	0.00123716
PRKCB1	0.00123716
PRPS1	0.00123716
MTMR9	0.00124451
TERF2	0.00124508
CTSD	0.00125363
HCST	0.00126739
LOC645737	0.00126739
ARHGAP9	0.00127353
OPA3	0.00127353
HBEGF	0.00127609
COX10	0.00127861
PIK3CG	0.00128196
GPR55	0.00129581
KCNA3	0.00129736
RABGAP1L	0.00129736
SFT2D1	0.00129919
C20ORF100	0.00131429
KLHDC5	0.00131429
GALNT10	0.00133346
C11ORF61	0.00135954
EGFL6	0.00136102
GNA12	0.00137061
MURC	0.00137061
PHYH	0.00137061
TRIM47	0.00137105
C15ORF57	0.00137154
ZYG11B	0.00138118
ZNF643	0.00139045
EEF1B2	0.0013916
HS.558488	0.0013916
LOC653199	0.0013916
FAM139A	0.00139806
CCL1	0.00139917
CXCL16	0.00139917
MTMR1	0.00139943
GPR174	0.00140773
LOC729905	0.00142231
ANKRD29	0.00143339
C16ORF52	0.0014425
HS.536451	0.00147422
HS.561747	0.00149901
MAP7	0.00151785
CASK	0.0015197
ZCCHC14	0.00153615
MTL5	0.00154711
INPP4B	0.0015647
STK24	0.00157406
TLE3	0.00157978
C14ORF132	0.00159122
HS.494932	0.00161097
RASSF1	0.00161998
LOC641750	0.00166505
DLG3	0.00167588
PSME4	0.00167588
ZNRD1	0.00168222
NEDD9	0.00168611
CASP1	0.00169358
ZDHHC11	0.00169667
SUSD1	0.00170113
CD151	0.00174572
SLC40A1	0.00174572
MFSD10	0.00175104
C3ORF21	0.00175167
TMBIM1	0.00175251
NELF	0.00175923
SNORD43	0.00176198
BRE	0.00176719
HS.120193	0.00177727
LOC439992	0.00178393
TSPAN4	0.00178846
DSTN	0.00179133
DYNC2H1	0.00179416
ZBTB9	0.00188661
FCGBP	0.00188988
GREM2	0.00193636
ZC3H3	0.00194349
LCP2	0.00199855
HS.415576	0.00201127
ATP1B1	0.00204506
SCAMP3	0.00205277
SESTD1	0.00206202
IL1RAP	0.00206517
PNMA1	0.00206517
LYN	0.00207128
IL29	0.00207642
NAG	0.00207642
NCF4	0.00207642
GNG10	0.00209766
IRAK2	0.00211146
PTGER2	0.00211146
TEAD4	0.00211146
OMA1	0.00212743
MCART6	0.00213936
TNFSF14	0.00213936
UCHL1	0.00213936
SATB1	0.0021887
PDLIM1	0.00220582
LY96	0.00221001
LOH3CR2A	0.00225679
LRP11	0.00225679
RNF167	0.00225679
S100Z	0.00226206
HS.382212	0.0022907
RLTPR	0.0022907
RTKN2	0.00230582
GGT7	0.00233392
HS.553363	0.00233392
NUP50	0.00235116
PCMT1	0.00235116
PARP15	0.00236511
CBR1	0.00237279
B3GALNT1	0.00238199
FAM113A	0.00239907
HAVCR2	0.00239907
HS.445843	0.00239907
LOC646100	0.00240182
CRTAM	0.00241146
ETHE1	0.00241375
PALLD	0.00241375
ZC3H4	0.00241375
LYL1	0.00242413
DUSP10	0.0024583
FAM129A	0.0024583
OSBPL8	0.0024583
NDST2	0.00247623
HS.535718	0.00247769
ABCA1	0.00249401
PPP1R2	0.00249958
GPR137B	0.0025059
ANKRD9	0.00251023
CLDN1	0.00251194
ACP6	0.00251952
C14ORF159	0.00251952
FAM105A	0.00251952
LOC90826	0.00251952
CHP	0.00252451
APOM	0.00253489
POLD3	0.00254173
RNASE6	0.00254401
MTMR11	0.0025506
RFESD	0.00258644
CENPL	0.00259164
STX7	0.0026424
TTC38	0.00264785
SLC7A11	0.00264841
POFUT1	0.00264917
AHR	0.00267812
FAM89A	0.00267812
OAF	0.00268186
C12ORF32	0.00273082
HS.197709	0.00274544
NINJ1	0.00274544
FCER1G	0.00274766
LOC644642	0.00274766
PAG1	0.00274781
ZMYM1	0.00274784
CHD9	0.00276603
TBK1	0.0027957
RELB	0.00279643
RBM33	0.00281413
HS.443123	0.00281846
LOC648059	0.00284505
RASGRF2	0.00284505
TGM5	0.00286689
IL7R	0.00288438
CAMSAP1	0.00288748
AKAP2	0.00289364
LOC402677	0.00289364
RAB38	0.00289364
LOC439949	0.0028994
LOC400652	0.00289971
MAP3K6	0.0029001
SLC25A17	0.00292478
NEXN	0.0029259
ZNF69	0.0029416
CCNA1	0.00295095
NFATC3	0.00297316
TRAF6	0.00297316
ANKRD33	0.00298048
C19ORF2	0.00301058
GPATCH2	0.00301058
ANXA4	0.00301161
MSRB2	0.00304065
PEX11A	0.00304738
SNX2	0.00306639
ITGA2	0.00307829
PTK2	0.00307829
S100A11	0.00310238
TOP1MT	0.00310238
LOC440589	0.00310481
SS18L2	0.00311724
GBP3	0.00312509
MBNL2	0.00314621
LOC552891	0.00315999
FLJ37396	0.00319353
INTS8	0.00320887
TPD52L2	0.00320887
CEBPG	0.00327878
PAPD5	0.00327878
BCR	0.00328844
HIST1H2BF	0.00330286
FAM129B	0.00334138
DHCR7	0.00334156
INPP5A	0.00334156
DNHL1	0.00337653
LOC158318	0.0033854
NCR3	0.00338672
ST6GALNAC4	0.00338672
NFU1	0.00339279
C6ORF192	0.00342056
GOLGA6B	0.00342056
LOC644250	0.00342056
MGC12760	0.00342056
CD83	0.00343374
MYB	0.0034769
HIST1H1B	0.0034962
TSTA3	0.00352634
BTF3L4	0.00357773
DUSP22	0.00357773
GNPDA1	0.00358176
ZNF649	0.00360838
ELK3	0.00363326
KIAA0408	0.0036451
PEX14	0.00364732
ST3GAL5	0.00364732
SDHALP1	0.00367397
FLJ20444	0.0036963
PIK3CB	0.00370752
FKBP1B	0.00377909
GCA	0.00377909
LOC654191	0.00377909
ZDHHC13	0.00377909
HS.373705	0.00384363
LOC642083	0.00398836
DAPK1	0.00399601
HSH2D	0.00399601
NMB	0.00402534
ORC6L	0.00402977
HS.443189	0.00403727
REXO2	0.00403727
ZNF609	0.00403769
HIST1H2BM	0.00403988
FREQ	0.00407598
SLC15A4	0.00407598
TICAM1	0.00407598
ZCCHC24	0.00407598
GTF2A1	0.00408564
FDX1	0.00421065
CD9	0.00421766
FLJ46309	0.00422721
HS.570988	0.00422721
ZCCHC9	0.00422721
LAIR2	0.00431118
C20ORF94	0.00431588
EFNB1	0.00431588
SBK1	0.00431588
TERT	0.00431588
TSPYL5	0.00434171
BCL3	0.00437502
G6PD	0.00437768
CTPS2	0.00439875
HS.322919	0.00440824
ENPP6	0.00442687
SLC16A9	0.00442687
ANKRD31	0.00447489
DUSP4	0.00448992
HPS5	0.00449889
ATPAF1	0.00450037
BRD3	0.00450037
CCL22	0.00451185
WDR59	0.00451185
HS.195634	0.00451371
RASSF6	0.00452685
DYSF	0.00455217
GPRIN3	0.00455708
PCDHB9	0.00458731
SMARCD3	0.00458731
HS.561915	0.00462348
C13ORF18	0.00464366
C21ORF24	0.00464366
HOXD3	0.00464366
LOC651576	0.00464366
SERPINA1	0.00464366
CPVL	0.0046437
MACROD1	0.0046437
KIAA0101	0.00471728
LILRB1	0.00472624
MRPS18C	0.00472999
GAD1	0.00473092
NSMCE1	0.00473197
CYB5R2	0.00473961
RHBDF2	0.00477031
IL6R	0.00477125
HMGCR	0.00480224
HSPA1A	0.00480224
KLRG1	0.00480224
PTGR2	0.00480224
PSMB3	0.00483473
LOC388588	0.00487494
TP53I3	0.00487494
LMOD3	0.00488478
NANS	0.00488478
OLIG3	0.00488478
C1ORF53	0.00489765
AGL	0.00494204
ZNF330	0.00497153
LOC441032	0.00497343
P15RS	0.00497343
DOCK8	0.00498192
EAF2	0.00503341
GIMAP8	0.00503341
GPR34	0.00505635
PIGX	0.0050687
NDRG1	0.00509961
CEP135	0.00511769
ZNF827	0.00512057
C6ORF58	0.0051779
DPYSL2	0.0051779
LOC648343	0.00518067
LOC653086	0.00521324
TXLNA	0.00521577
CRSP9	0.005224
HS.481659	0.00522559
UBE2W	0.00524544
LOC730360	0.00524965
TNFRSF4	0.00524965
CEP55	0.00532104
IL10RA	0.00533199
ST6GALNAC6	0.00534784
FOXI2	0.00538652
TST	0.00540739
GTF2IRD1	0.00548829
MIST	0.00553074
SLC14A1	0.00556362
IIP45	0.00557145
ATP8A1	0.00557597
DTNA	0.0055986
C1ORF74	0.00560052
LMAN1	0.00560091
CLECL1	0.00560352
HS.569104	0.00567893
SLC35E4	0.00567893
FYTTD1	0.00576084
KCNQ1	0.00576084
SIRPG	0.00576826
GOT1	0.00577441
ACOT4	0.00580153
TSPAN9	0.00580153
RPP30	0.0058071
HS.32135	0.00581048
C14ORF72	0.00581866
ARHGAP23	0.00582679
NIT1	0.00584245
SLC36A4	0.00586122
BAT3	0.00586812
GNLY	0.00588413
05.mar	0.00588844
CCDC44	0.00596393
INVS	0.00596553
ATP6V0A4	0.00603183
FCHO1	0.00603183
HDHD3	0.00603183
SLC16A10	0.00603183
TLE2	0.00603183
UGCG	0.00603183
GPC2	0.00605048
TRAF3IP2	0.00605074
ALG2	0.00607696
ZNF778	0.00607696
ACOT1	0.00610302
CCDC90B	0.00610302
FUBP1	0.00610302
SLC5A8	0.00610302
EPHB1	0.00611329
EGR2	0.00617872
CSNK1G3	0.00618173
C15ORF39	0.00618329
CLIP1	0.00620783
SLC25A1	0.00620783
LOC152195	0.0062228
LOC387820	0.00622613
LOC642361	0.00622613
RCN3	0.00622613
TERF1	0.00622613
TRPV2	0.00622613
ZDHHC14	0.00626575
ARMC5	0.0062817
SEC61A2	0.0062914
ASCL1	0.00631816
C4ORF19	0.00631816
MAGI3	0.00631816
NEIL3	0.00631816
PGAP1	0.00631816
IL17RD	0.00635446
KLRD1	0.00635538
PRKCI	0.00638607
PYCR2	0.006398
AGTR1	0.00642331
GZMA	0.00642331
PTGS1	0.00647304
RAB11FIP4	0.00649756
C9ORF130	0.00651721
LOC650803	0.00651721
MTSS1	0.00651721
EHD4	0.00652021
LOC642321	0.00652753
SCRN1	0.00652753
FGL2	0.00653034
GPRIN1	0.00653034
FTH1	0.0065315
SPECC1	0.0065315
LOC400236	0.00654976
FAM65A	0.00656621
ADIPOR1	0.00660504
GSDMD	0.00661516
SCCPDH	0.00664489
OPLAH	0.00667988
SLC9A5	0.00667988
APOBEC3H	0.00674901
POLR2D	0.00675259
REL	0.00675259
CYBRD1	0.00675622
KCNH3	0.00675622
SUSD3	0.00675622
USP30	0.00675622
LOC644096	0.00675702
LOC650254	0.00680095
VNN2	0.00689994
ZNF193	0.0069267
TSPYL2	0.0069281
HDGF2	0.00694507
CCR2	0.0069549
MAF	0.00701075
C1ORF198	0.00710483
CPXM1	0.00711038
FLJ22374	0.00711391
GLTPD1	0.00711391
HS.547551	0.00711391
STK17B	0.00711391
TFPI	0.00711391
SLC6A9	0.00711454
CBX8	0.00713408
CD200	0.00718606
CASP3	0.00719976
TCF2	0.00723751
TBCE	0.00723839
APOBEC3B	0.00726662
ATF7	0.00726662
CENTA1	0.00726662
ZNF273	0.00726804
RPS6KA3	0.0072778
IER5	0.00727884
TSPAN32	0.00733427
ACTN4	0.00734403
ZNF512B	0.00738812
ZNF763	0.00741535
SMAD3	0.00741575
IL6ST	0.00748783
PTPRK	0.00748783
CSPG5	0.00752502
ALPK1	0.00755813
C9ORF66	0.00755813
HS.553068	0.00755813
LOC643882	0.00755813
MVK	0.00755813
VAMP1	0.00757308
LOC644590	0.0076162
SCD5	0.0076162
TJP2	0.00765038
C22ORF13	0.00765378
SLC2A8	0.00767643
MOSPD2	0.00771499
BTBD3	0.00777061
HS.555181	0.00777199
SLC4A5	0.00778269
OSBPL1A	0.00779488
PTPN2	0.00790184
NSFL1C	0.00793862
ITPRIPL1	0.00795384
SCML4	0.00795384
CLC	0.00797834
HABP4	0.00798902
PSEN2	0.00806943
CHCHD6	0.00810291
HS.533995	0.00810491
CFDP1	0.00812686
XRCC6	0.00818744
RPRD1A	0.00820697
HS.538259	0.00823129
TMEM169	0.00823129
C14ORF94	0.00824325
FLJ20160	0.00826331
ANAPC10	0.00826597
LIMS1	0.00829299
PXK	0.00832222
DHRS9	0.00835346
CCDC4	0.00838768
PIM3	0.00838768
SLC25A28	0.00838768
DHRS7	0.0083953
FCAR	0.0083953
HS.125444	0.00839531
C1ORF59	0.0084061
CCNYL1	0.00840847
LOC400963	0.00841089
LOC649270	0.00841089
FLJ20489	0.00844264
KRTAP20-2	0.008446
GIMAP7	0.00846283
HS.177930	0.00848534
AUH	0.00849604
PTMS	0.00858062
HS.40061	0.00861942
ZNF223	0.00861942
DCUN1D1	0.00864652
HS.406790	0.00864652
GOLGA8B	0.00865127
FBXO34	0.00866578
BMP8B	0.00867055
CASC3	0.00867055
LAYN	0.00867055
LOC285016	0.00867055
CAMK4	0.00870577
PLEKHM2	0.00870577
PREX1	0.00874152
KLHL5	0.00878234
LOC163233	0.00878234
TEX11	0.00878234
PMF1	0.00881045
KIAA0040	0.00881905
MED30	0.0088495
NMT2	0.0088495
LOC123688	0.00885851
LOC731096	0.00887821
HIST1H4B	0.0089666
PPP1R3D	0.0089666
ZNF281	0.0089666
ACOT2	0.00902405
HS.137068	0.00902405
SLC28A3	0.00902405
UCKL1	0.00903136
CATSPER1	0.00907789
HS.12876	0.00907789
C20ORF3	0.00908733
ANKRD35	0.00911189
HS.575268	0.00911189
MAMLD1	0.00911189
PIM2	0.00912899
ALPP	0.00913552
FHL1	0.00914116
KLF4	0.00915597
TMEM89	0.00915597
PLEKHB2	0.00924328
C14ORF138	0.00932889
RNF128	0.00938876
DLEU1	0.00946074
ELMOD2	0.00948026
ARNTL	0.00954789
GZMH	0.0095481
DYNLL2	0.00955808
HIST1H4I	0.00955808
SEC61B	0.00955808
C1ORF77	0.00956987
LOC440871	0.00962336
F2RL1	0.00967628
HS.559869	0.00967628
RNF217	0.00967628
BOAT	0.00969302
C1ORF116	0.00969911
LGALS9B	0.00971158
PRDX2	0.00971158
C3ORF52	0.00981721
ETV5	0.00982545
NPEPPS	0.00986107
HS.558286	0.00990452
RGMA	0.00990721
PCNX	0.009931
COP1	0.00994448
TRIM14	0.00999064
FLJ20699	0.0100031
HIST1H3G	0.0100031
HS.121525	0.0100031
HS.240801	0.0100164
C4ORF23	0.010019
CXORF57	0.0100233
ZNF589	0.0101655
CRIP1	0.0101766
KIF1B	0.0102097
SNX14	0.0102481
PELI2	0.0102489
GSTA4	0.0102591
KLHL6	0.0102858
PEX19	0.0103108
NTRK1	0.0103576
YIF1B	0.0103908
CLK1	0.0105911
MPP1	0.0106001
C5ORF5	0.0107396
CD93	0.0107455
ELA1	0.0107672
MBD4	0.0108234
LOC642732	0.0108717
ITGB5	0.010877
SC4MOL	0.0110123
ZNF438	0.0110144
GUSBL2	0.011047
NFE2L3	0.011047
SCAMP4	0.011047
TRAF1	0.0110486
TBC1D22B	0.011061
DENND5B	0.0110757
GLTP	0.0110757
KIF21A	0.0110757
LOC651860	0.0110757
NR1H2	0.0110757
CCR1	0.0111
ITGAE	0.0111
TTC39B	0.01119
PLXNA3	0.0111956
NDUFB8	0.0113806
ZBTB17	0.0113944
STK3	0.0114102
ASB3	0.0114328
LOC221442	0.0114328
KISS1R	0.0114345
PRTFDC1	0.0115883
HIF1AN	0.0116903
PTPRM	0.0116954
ADO	0.0117093
C15ORF40	0.0117956
HNRNPA0	0.0118319
LOC646897	0.0118435
PIK3CD	0.011938
BMI1	0.0119423
TNK2	0.011946
PTPN6	0.0119622
HS.512090	0.0120141
MAFF	0.012027
TMEM135	0.012027
C1ORF187	0.0120413
STARD5	0.0120413
MKL1	0.0121119
ALDH4A1	0.0121621
CSF2RA	0.0121626
IL12RB1	0.0121626
IRF1	0.0122651
C2ORF76	0.0122734
CSTF2T	0.0123234
SLC25A38	0.0123776
ACBD7	0.0123929
RERE	0.0123929
TANC1	0.0124153
HSF5	0.0125204
PANK3	0.0125427
ADAL	0.0125472
HS.12513	0.0125472
LOC652771	0.0125643
HS.501656	0.0125778
TEX14	0.0125778
PLD2	0.0125827
CCDC81	0.0126182
MVD	0.0126182
MAST4	0.012633
NET1	0.0126719
OPA1	0.0126757
LOC26010	0.0127141
LIPC	0.0127464
CCNF	0.0127478
DUSP2	0.0127763
ZDHHC9	0.0127927
DHTKD1	0.0128027
LOC440093	0.0128027
PROSC	0.0128027
OR10J3	0.012819
ISCA2	0.0128306
FVT1	0.0128875
MED25	0.0128875
WBP2	0.0128875
RNASET2	0.0129533
LOC651143	0.012985
PLS3	0.0132369
GDPD1	0.0132616
RALBP1	0.0132846
VPS4A	0.0132846
PLEKHA9	0.0132874
LOC728758	0.0133164
RUFY4	0.0133415
FAM92A1	0.0133804
IGF2BP2	0.0133844
NDRG2	0.0133844
LOC730344	0.0134801
NUBPL	0.0134801
SMCR7L	0.0135045
NPCDR1	0.0135225
TMEM213	0.0135225
METTL9	0.0135545
POLB	0.013564
ZFPL1	0.013564
LOC387763	0.0135992
C9ORF80	0.013611
F5	0.013611
C17ORF69	0.0136171
LOC650799	0.0136171
STAG3	0.0136217
GPR68	0.0136308
GDF10	0.0136463
TRAF3	0.0136463
FUT5	0.0136622
LOC400304	0.0136622
EIF4EBP1	0.0137119
TBXAS1	0.0137399
C6ORF170	0.013827
SPN	0.0138645
AKR1D1	0.0138752
HS.317399	0.0139966
MSL3L1	0.0141107
LTBP4	0.0141469
CD52	0.0141682
PLEKHO1	0.0141742
ARF6	0.0141831
GLS	0.0141831
KIF1A	0.0142236
EPAS1	0.0142493
POR	0.0143258
PRKAG2	0.0143381
AGPAT4	0.0143512
PRPS2	0.0143919
DDX42	0.0143925
HS.529514	0.0143925
C10ORF61	0.0144309
CBX5	0.014523
STK36	0.0145948
LOC647054	0.0146149
LOC643509	0.014625
HIST1H3I	0.0146737
TRERF1	0.0146737
CHN1	0.0146764
UBE2V2	0.0146994
CICK0721Q.1	0.0147308
LOC653829	0.0147308
PRR7	0.0147308
RCAN2	0.0147308
TPR	0.0147308
KIAA0831	0.0147905
E2F8	0.0148448
PNOC	0.0148547
HS.567759	0.0148824
LOC441408	0.0148852
HS.126245	0.0149092
HOXB7	0.0149727
LOC648852	0.0149975
SLC44A1	0.0149975
PLCL1	0.0150538
SPG21	0.0151125
MCM8	0.0152118
SEC22A	0.0152629
ROCK2	0.0153063
ACVR1	0.0154155
ADCY9	0.0154155
ASS1	0.0154155
GPKOW	0.0154155
INTS3	0.0154155
LOC645203	0.0154155
VPS37C	0.0154155
RCBTB2	0.015524
CLEC3B	0.0155277
IKIP	0.0155277
KLHL12	0.0155277
LRG1	0.0155277
PORCN	0.0155277
ZNF138	0.0155277
NEIL2	0.0155499
FLJ32679	0.0156086
MAPRE3	0.0156086
ZIC2	0.0156086
HS.443490	0.0156291
LST1	0.0156553
ZBTB7B	0.0156553
RAP1GDS1	0.0156783
LOC440280	0.0157279
NUAK2	0.0157279
PPM1M	0.015754
HS.544785	0.0157612
C1GALT1	0.0158037
MPST	0.0158037
NLRP3	0.0158037
TBC1D2	0.0158037
USP14	0.0158037
ADM2	0.0158647
BRPF1	0.0158647
URG4	0.0159561
C6ORF148	0.0159775
GPC6	0.0159775
PTPLAD2	0.0159775
SLC27A5	0.0159775
AIRE	0.0159883
NAPSA	0.0159883
NCK1	0.0159883
PCGF6	0.0159883
RPS5	0.0159883
HSD17B4	0.015998
MAPK11	0.0159986
LIMS2	0.0160113
GIMAP5	0.0160457
ODF2	0.0160457
TRIM32	0.0160615
LOC644338	0.0161367
ATM	0.0162468
PYHIN1	0.0162468
WWC3	0.0162468
SPATA3	0.0162747
TKT	0.0162747
PNKP	0.0163693
SHROOM1	0.0163693
PDE9A	0.01639
TMIGD2	0.0164044
POU4F1	0.0164446
GCH1	0.0164939
RBPJ	0.0165194
NCOA2	0.0165785
NACA2	0.0165855
PDIA3P	0.0165855
LOC642350	0.0166081
CLK2	0.0166328
TLR6	0.0166328
HS.374460	0.0167432
HS.348844	0.0167973
PTCH1	0.0167973
HS.495080	0.0168471
PCTK3	0.0168471
C9ORF30	0.0168684
HS.430589	0.0169235
USP11	0.0169687
LOC653895	0.0170578
CACNA1I	0.0171036
LOC645100	0.017157
KIAA1751	0.017186
ENC1	0.0172247
HS.571527	0.0172264
LOC644846	0.0172653
LRFN3	0.0172653
PTPN9	0.0172653
SERPINE1	0.0172653
DCP1A	0.0172745
C11ORF75	0.0172972
CDKN2AIP	0.0172972
PTPRO	0.0172972
SEMA3A	0.0173054
C7ORF42	0.0173347
SNF1LK	0.0173765
ZNF541	0.0173824
ERCC2	0.0173825
APOD	0.0174033
TBC1D19	0.0174033
HS.538610	0.0174097
PPP3CB	0.0174165
RAB5C	0.0174165
SLC43A2	0.0174165
TRAF7	0.0174574
PSCDBP	0.0174778
ZFP106	0.0174872
JAK3	0.0174952
C21ORF7	0.0175704
C2ORF25	0.0175704
LOC440704	0.0175704
SUOX	0.0175704
CALCB	0.017594
LOC400713	0.017594
SDHAP3	0.017594
FSTL3	0.0176445
LOC643930	0.0176445
VCY	0.0176445
TTTY5	0.0177108
CECR1	0.0177534
ADRA1D	0.0177726
FAM120B	0.0177726
UBXN2A	0.0177743
IL10	0.0177785
KLRC1	0.0177785
LOC723972	0.0177785
CYP1B1	0.017781
NUP62	0.0178107
BMPR2	0.0178882
LOC731486	0.0179311
SHMT1	0.0179313
DC2	0.0179664
HS.573537	0.0179971
C17ORF60	0.0181101
DNAH5	0.0181101
FLJ44124	0.0181101
JUNB	0.0181101
PEX7	0.0181101
PWWP2	0.0181101
STAR	0.0181101
PSENEN	0.0181386
RDH10	0.0181386
DHX32	0.0182291
XKRX	0.0182476
PIBF1	0.0182526
ROGDI	0.0182526
RPS14	0.0182526
LOC642233	0.0183334
ZFYVE20	0.0183818
PLAT	0.0184139
RGS12	0.0184249
GEMIN8	0.0184383
SURF4	0.0184443
ABHD14A	0.0184554
C12ORF39	0.0184586
LRRC37A4	0.0184586
SLC2A1	0.0184586
FURIN	0.0184907
CCL17	0.0184954
HS.568805	0.0184954
SCP2	0.018679
NLRP8	0.0186815
SIPA1L2	0.0187312
C1ORF102	0.0187811
DNAJC21	0.0187998
VPS26B	0.0188218
ADPRH	0.0189246
LOC390876	0.0189246
CCDC32	0.0189684
KIAA0586	0.0189684
KLF3	0.0189684
MCOLN3	0.0189763
SFMBT2	0.0189763
SLCO4C1	0.0189991
HS.181500	0.0190257
NHLRC3	0.0190289
RPS15	0.0190611
XPNPEP3	0.0190611
HS.543724	0.0191247
HS.583250	0.0191247
ATP6AP2	0.0191348
FSD1	0.0191348
KIAA0492	0.0191716
MYCBP	0.0191716
HS.86045	0.019204
C17ORF85	0.0192265
HS.47702	0.0192265
ZNF549	0.0192295
C17ORF66	0.0192766
CSTF2	0.0192766
PLEKHN1	0.0192766
CDKN2A	0.0193022
ZAP70	0.0193098
ITM2B	0.0193404
AHI1	0.0193602
CORO1C	0.0193602
S100A4	0.0193602
SETBP1	0.0193602
TK1	0.0193602
TRAPPC2L	0.0194029
HS.130916	0.0194364
ADRB2	0.0194612
CARD11	0.0194612
CDC42EP5	0.0194612
MDK	0.0195348
PPAPDC1B	0.0195516
AFM	0.0195572
PRAMEF8	0.0195572
KLRC2	0.0196031
GPR1	0.019717
PXMP3	0.0197888
HSD17B7	0.0198772
H1F0	0.0199
CRIM1	0.0199901
ATHL1	0.0200021
DIP2B	0.0200021
DMC1	0.0200021
LRRC31	0.0200447
PRKDC	0.0200718
DHPS	0.0200908
GSTTP2	0.0200908
CENTG2	0.0200908
CLK4	0.0200908
FTHL7	0.0200908
HS.545952	0.0200908
PDZD4	0.0200908
PRG2	0.0200908
SIPA1	0.0200908
TNIP3	0.0200908
SLC45A4	0.0200946
SPIN1	0.020135
IRS1	0.0201622
HS.142570	0.0201804
NAPB	0.0201804
ICHTHYIN	0.0202319
sep.10	0.0202796
CDH23	0.020358
RANBP3	0.020358
ATG10	0.0203597
ZNF483	0.0203597
LOC653489	0.020411
RCP9	0.0204388
RGPD2	0.0205068
FKTN	0.020573
IRF2BP2	0.020573
IRF8	0.020573
LOC154449	0.020573
CLCN7	0.0206667
PGM3	0.0207108
CPSF6	0.0207828
NAPG	0.0207828
XCL2	0.0208065
CCDC91	0.0208779
ARCN1	0.0209411
RNASE4	0.0209411
SEPSECS	0.0209411
TADA1L	0.0209411
PDCD4	0.0210654
PRKCH	0.0210654
MGC10997	0.0211306
HS.567135	0.0211513
EIF3D	0.0212067
HS.537591	0.0213214
DTWD2	0.0214814
KREMEN1	0.0214814
CBARA1	0.0214881
GMDS	0.0214881
CRTAP	0.0215098
HS.123119	0.0215312
RP5-1022P6.2	0.0215549
AKT2	0.0215697
HS.508889	0.0215697
PIN4	0.0215697
ZNF280B	0.0215697
CCDC107	0.0215848
CCDC89	0.0215848
C19ORF70	0.0216124
ZNF621	0.0216922
CCR6	0.0217033
RUVBL2	0.0218868
SH3TC1	0.0219168
MED13	0.0219287
FLJ22184	0.0219989
HS.107418	0.0220111
C12ORF65	0.022082
LYRM4	0.0220906
TIMP2	0.0221397
DPEP3	0.0221859
TMEM64	0.022212
HS.562875	0.0222628
C6ORF128	0.0223203
PQBP1	0.0223203
BLZF1	0.0223693
USP49	0.0224246
HS.512096	0.0224858
AOAH	0.0225253
CDKL1	0.0225253
GRK6	0.0225253
PANX2	0.0225253
SSTR2	0.0225253
TPM2	0.0225253
ZNF323	0.0225253
GNA15	0.0226076
TM2D3	0.0226076
LILRB3	0.0226934
LOC441775	0.0226934
UNC119	0.0226934
KIDINS220	0.0227319
C5ORF28	0.0227328
PARL	0.0227328
LMNB1	0.0227977
DLK2	0.0229176
WASF3	0.0229284
SNX5	0.0229414
ATP6V1A	0.0230282
EIF4H	0.0230282
CEP63	0.0231057
LOC641987	0.0231057
NCOA6IP	0.0231057
RRM1	0.0231057
SNX30	0.0231057
C21ORF55	0.023175
MINA	0.0232719
SLC25A45	0.0232719
HS.524163	0.0233066
HS.569596	0.0233066
RNF126	0.0233066
DDX60	0.0233111
LOC255783	0.0233111
MTO1	0.0233111
MTHFS	0.0233525
SNUPN	0.0233612
CD96	0.0234054
DCDC5	0.0234915
HS.365134	0.0234915
KCTD2	0.0234915
LAMA2	0.0234915
LOC389517	0.0235332
SERPINI1	0.0235778
SLC26A6	0.0235778
TLE6	0.0235778
LOC730077	0.0237046
HS.293024	0.0237317
IKZF4	0.0237317
SYTL2	0.0237317
C18ORF24	0.0237756
MYST1	0.0237931
RSRC2	0.0237931
PDE4C	0.0238495
NARF	0.023859
SPRY4	0.0238591
C21ORF59	0.0238646
FLNA	0.0238791
HS.508690	0.0238791
ZNF295	0.0238791
HPCAL1	0.0239051
VPS13D	0.0239051
SPIRE2	0.0240847
DNAJA2	0.0242685
TCTEX1D2	0.0242685
HS.46689	0.0242755
TCEB1	0.024344
ZNF271	0.024344
DNAJB1	0.0243971
UBASH3A	0.0244224
AMOT	0.0246262
TSGA14	0.0247311
LOC90586	0.0248078
DZIP1L	0.0248242
FLOT1	0.0248242
HOPX	0.0248242
C2ORF28	0.0249808
HS.564035	0.0249808
BCL2L15	0.0249829
CD82	0.0249852
BCAT2	0.0250248
CREB1	0.0250591
TCEA3	0.0251275
COMMD6	0.0252357
GRAMD3	0.0256196
CCDC126	0.0257077
LOC389786	0.0257118
CD74	0.0258447
TXNDC12	0.025903
ARRB1	0.0259527
PTEN	0.0260887
ZNF341	0.0261356
RUNX2	0.0262325
TNFRSF19	0.0263248
FLJ40722	0.026363
LOC654046	0.026363
PPID	0.026363
EGFLAM	0.0263837
SUMF1	0.0264365
ZNF101	0.0264489
C19ORF56	0.026449
RDBP	0.0264495
IRF3	0.0264636
MS4A2	0.0265149
SMTNL1	0.0265572
HS.561105	0.0266003
PDE6D	0.0266728
LOC649049	0.0266887
PI4K2B	0.0266887
EI24	0.0267168
SCARNA9	0.0267168
ZNF574	0.0267168
TMEM16C	0.026754
TSPAN7	0.0267662
POLR2J4	0.0267686
LOC728499	0.0268483
RPS3	0.026904
ZNF394	0.026904
CCL4L2	0.0269144
SFN	0.0269777
HS.567078	0.0269891
ZFP36L1	0.0270807
AMY1B	0.0272299
BOK	0.0272299
HS.572752	0.0272299
IL27RA	0.0272299
SRC	0.0272299
HS.442696	0.0273138
CACNG3	0.0274394
DUSP12	0.0274688
SMAP2	0.0274926
CSNK1A1	0.0275202
FAM90A1	0.0275933
EDC4	0.0276623
CAPSL	0.0277403
LOC285908	0.0277403
GCET2	0.0278974
ZNF174	0.0279193
HS.540116	0.0279492
HS.545643	0.0279492
ZSWIM1	0.0279492
HS.495041	0.0279613
HS.574008	0.0279613
LOC375748	0.0279613
RYBP	0.0281766
HSPC152	0.0282855
LAX1	0.0283388
MTDH	0.0283388
GOLGA8A	0.0283496
TMEM183A	0.0283496
FAM152B	0.0283849
C4ORF39	0.0284046
LOC727820	0.0284046
PQLC1	0.0284046
BRAF	0.0284108
RHOG	0.028411
LOC643011	0.0284284
HS.127310	0.0284897
GNGT2	0.0284958
LOC400721	0.0286081
03.mar	0.0286081
HDAC1	0.0286412
CD244	0.0286455
HRASLS3	0.028652
HIST1H2BG	0.0286955
NOS3	0.0287112
KIAA0460	0.0287502
C21ORF91	0.0287812
LOC390354	0.0287984
FKBP14	0.0290302
CACNA2D2	0.0290442
RNU2-1	0.0290442
LIX1L	0.0290973
LOC644769	0.0291736
MYH4	0.0291736
TMEM63A	0.0291736
ZNF772	0.0291757
EPHA1	0.02924
LOC730256	0.02924
JUND	0.0292424
VAV1	0.029562
SLC44A4	0.0295966
BAP1	0.0296834
LRRC3	0.0296834
HS.560343	0.0296954
LOC650116	0.0297719
PLEK2	0.0297719
LOC729603	0.0298125
LOC642380	0.0298303
CLIC5	0.029835
YIPF4	0.0299359
FUT6	0.0299849
PPP3R1	0.0300013
PSMB8	0.0300666
RAXL1	0.0300666
EIF2C3	0.030087
PLA2G2D	0.0302904
NT5C	0.0303185
FLJ11292	0.0303515
DPP9	0.030452
RUNDC2C	0.030452
SKP2	0.030452
ZNF430	0.030452
ZNF294	0.030507
AOF2	0.0305185
BAIAP2L1	0.0305326
HSPA1B	0.0305326
LOC145853	0.0305326
HS.276860	0.0305731
CRHR1	0.0306384
PHF7	0.0306384
ZNF789	0.0306384
ABCC1	0.0306526
MEIG1	0.0306526
RWDD2A	0.0306526
KIAA1957	0.0306768
CDC40	0.0308375
MGC20983	0.0308563
MGC16121	0.031151
CTBP1	0.0311612
KIAA0367	0.0311612
MIF	0.0311622
LOC650739	0.0311981
CCDC37	0.0312055
ANXA2P1	0.0312289
FLJ21687	0.0312289
THOC7	0.0312289
SPIB	0.0313662
MID2	0.0313742
UBQLN1	0.0314291
LOC649214	0.0315489
LOC649987	0.0315951
GIMAP4	0.0316996
RPS25	0.0316998
LOC441461	0.0317942
RABGAP1	0.0317979
HS.551340	0.0318291
C16ORF58	0.0318335
HS.202140	0.031892
C9ORF167	0.0319164
SLC7A4	0.0321203
KCNG3	0.0321385
DCLRE1A	0.0321628
HS.568951	0.0322904
SLC16A11	0.0322904
DUXAP3	0.0322922
HBB	0.0322922
SNRPB	0.0323673
C10ORF57	0.0324192
GJA10	0.0324508
SDK2	0.0324608
LOC728441	0.0324959
TPD52	0.0326012
CCBE1	0.0327609
FAM80B	0.0327782
ICOSLG	0.0327782
ITIH5	0.0327782
LOC255809	0.0327782
LOC648366	0.0327782
LOC728564	0.0330671
MDH2	0.0331185
LOC649456	0.0331526
NGRN	0.0333237
FERMT2	0.0334886
INTS6	0.0334886
MYO7A	0.0334886
RPL39L	0.0336596
SHCBP1	0.0337949
GPSN2	0.0338471
LOC399900	0.0339312
LOC651816	0.0339312
ZCCHC5	0.0339802
RN7SL1	0.0341391
RAD51C	0.0341802
YIPF1	0.0342095
PSCD2	0.0342378
BIRC3	0.0342388
FLJ44006	0.0343119
PNMA2	0.0343484
LOC400965	0.0344394
STK11	0.0344564
DEAF1	0.0345766
ABCF1	0.0346957
ENO3	0.0346957
HS.578080	0.0346957
PHTF1	0.0346957
SP5	0.0346957
CUX2	0.0347374
LOC392979	0.0354075
C1ORF31	0.0354749
LEPR	0.0355134
GAS2L3	0.0355631
GRAMD4	0.0355631
HS.578444	0.0355631
KCNQ5	0.0357267
DOCK9	0.0358316
SRGN	0.035839
AGPAT3	0.0359112
SLAMF1	0.0359315
GPR3	0.0360077
SUMF2	0.0360096
NFIL3	0.0360778
GLUD1	0.0361468
HS.98949	0.0361468
RAB18	0.0361468
DOPEY2	0.0362957
HECW2	0.0362957
KIRREL2	0.0363287
C14ORF108	0.036597
C1ORF61	0.036597
CCND3	0.036597
HS.163752	0.036597
EFHB	0.036621
JAG1	0.036621
HS.535028	0.0367019
HLX	0.0370201
HS.528210	0.0370841
CAMTA1	0.0371123
LOC646082	0.0371123
ERLIN2	0.0371273
SAMD1	0.0371313
CA6	0.0372415
HS.568814	0.0372415
LYPD5	0.0373138
UGDH	0.0373138
ZNF14	0.0373499
TMEM183B	0.0373938
MTMR12	0.0373939
TMEM189	0.0373939
TUSC3	0.0373939
HYPK	0.0375147
RIMS3	0.0375474
RBM42	0.0375808
CBX3	0.0377152
SLC35E1	0.0377316
PPP2R5D	0.0377984
COIL	0.0378644
ITGAV	0.0379083
C15ORF53	0.0379392
MB	0.0379392
MAGT1	0.0379471
SMG7	0.0379471
LOC650751	0.0379875
HPRT1	0.0381751
CNR1	0.0383444
CENPI	0.038456
DPY19L2	0.038456
HNRNPU	0.038456
HS.34558	0.038456
MCPH1	0.038456
SNX11	0.038456
PIP4K2B	0.038476
NOL3	0.0384776
SLC39A4	0.0385256
CDC42EP2	0.0387353
CD59	0.0387421
FAM63A	0.0387421
HS.579487	0.0388116
MPZL3	0.0388116
HS.566514	0.0388503
HS.50125	0.0388839
HS.544783	0.0388839
L2HGDH	0.038897
HS.400131	0.0389129
LEP	0.0389129
BIRC2	0.0389213
HS.539934	0.0389213
PIH1D1	0.0389213
EID2B	0.0391276
C7ORF31	0.0392334
CABLES1	0.0392758
SLC30A1	0.0393606
MGC24125	0.0393692
C10ORF10	0.0394324
NUDT22	0.0394737
PARD6G	0.0394737
DIRC2	0.0395744
HERPUD2	0.0395866
LOC647389	0.0395866
ANG	0.0396298
CACNA1H	0.0396298
TMEM168	0.0396298
ATP6V0E2	0.0396388
SSU72	0.0396677
CHMP7	0.0397394
HS.525917	0.0397829
ATP6V1E2	0.0398239
LPIN2	0.0399294
ATG3	0.0399586
CD84	0.0399586
RELA	0.0399586
C2ORF7	0.0400014
EHHADH	0.0401061
SMG5	0.0401137
OPTC	0.0402861
LOC732075	0.0403206
ACVR1B	0.0404159
TDP1	0.040457
ELP4	0.0404759
PHACTR2	0.0405414
TMEM107	0.0405453
AKAP7	0.0407876
C21ORF45	0.0408896
FLJ22795	0.0409935
HS.575583	0.0409935
CSNK2A1	0.0410989
PDE4B	0.041105
FIGNL1	0.0412574
MT1E	0.0412813
PSMB6	0.0412813
ACAA1	0.0413908
MC1R	0.0413908
C1ORF142	0.0416137
C14ORF181	0.0416592
HS.120009	0.0416592
KIAA1600	0.0416592
TBP	0.0416592
MAN1A1	0.0417198
CBX2	0.0418206
PTGS2	0.0418275
ZNF239	0.0418275
HS.562219	0.0419848
SHC4	0.0419848
PVRIG	0.0420039
C14ORF85	0.0420939
PBLD	0.0421332
ZNF704	0.0421332
TNFRSF9	0.0421384
ACTR6	0.0421657
HSPC268	0.0421922
ZNF486	0.0422246
MLLT4	0.0422986
HS.493592	0.0423635
CCDC71	0.0423881
TATDN3	0.0423881
LOC653471	0.0423883
FNDC1	0.0424989
FLJ12688	0.0426461
C8ORF34	0.042666
HIST1H3C	0.042666
STK35	0.042666
SNTG2	0.0427937
SLC38A9	0.0429164
FNTA	0.0429338
TTC19	0.0429722
HS.291319	0.0431566
LOC645442	0.0431566
RBM17	0.0431572
HS.157234	0.0431872
INSL3	0.0431872
LOC651208	0.0431872
LOC728411	0.0432454
LSDP5	0.043323
CCL13	0.0434407
SRD5A1	0.0434407
MAPK14	0.0434487
SPTLC1	0.0434487
ANXA6	0.0434557
ATRIP	0.0434557
COPS3	0.043526
GAS2L1	0.0436914
[truncated: 130 more rows]
